# Supplementary material
Source: Springer Nature journal article supplement (https://www.springermedizin.de/resource/supplementary/12885_2013_4781_MOESM3_ESM.pdf/9467248)

### 3-year costs

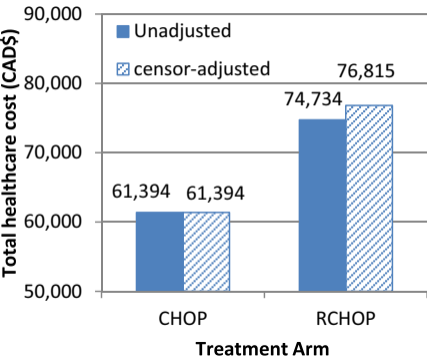

### 5-year costs

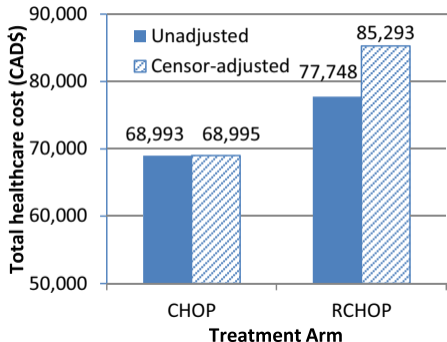

Supplement: MOESM3 [file 9467248]
